# Supplementary material
Source: PubMed Central journal article supplement (PMC10592403)
Supplement: NIHMS1914154-supplement-1.pdf [file NIHMS1914154-supplement-1.pdf]

# Supplemental Figure 1

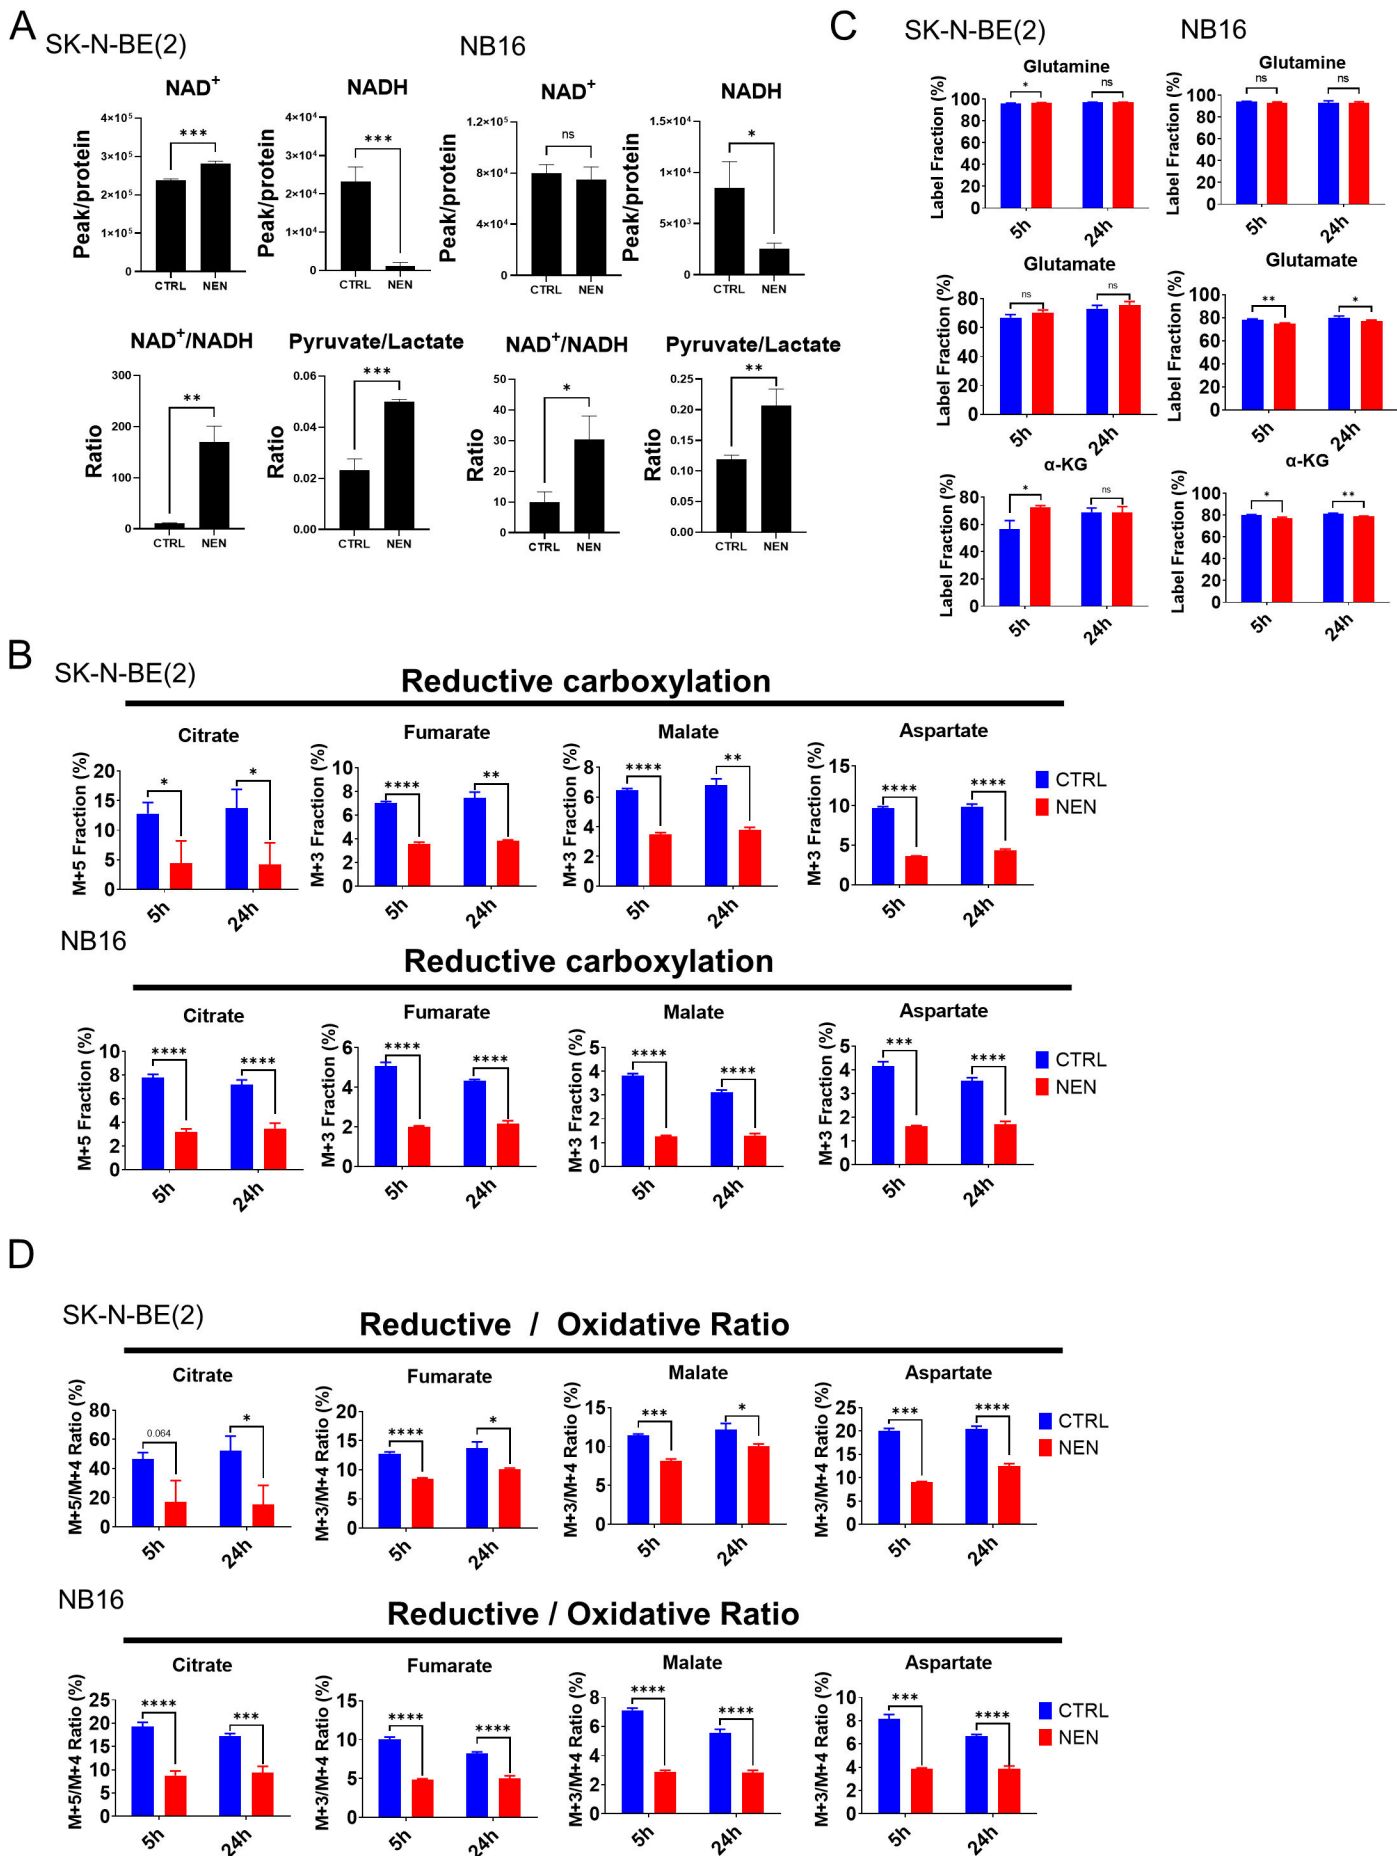

## Supplemental Figure 1

**(A)** NB16 and SK-N-BE(2) cells were treated with DMSO or 1  $\mu\text{M}$  NEN for 2 hours and the relative intracellular metabolites were measured using LC-MS. **(B, C, and D)** NB16 and SK-N-BE(2) cells were pretreated with DMSO or 1  $\mu\text{M}$  NEN for 3 hours or 22 hours, then labeled with U- $^{13}\text{C}$ -glutamine for 2 hours. Relative isotopic labeling fractions or ratios of metabolites were measured using LC-MS.
