# Supplementary material
Source: PubMed Central journal article supplement (PMC10592403)
Supplement: NIHMS1914154-supplement-2.pdf [file NIHMS1914154-supplement-2.pdf]

# Supplemental Figure 2

**A**

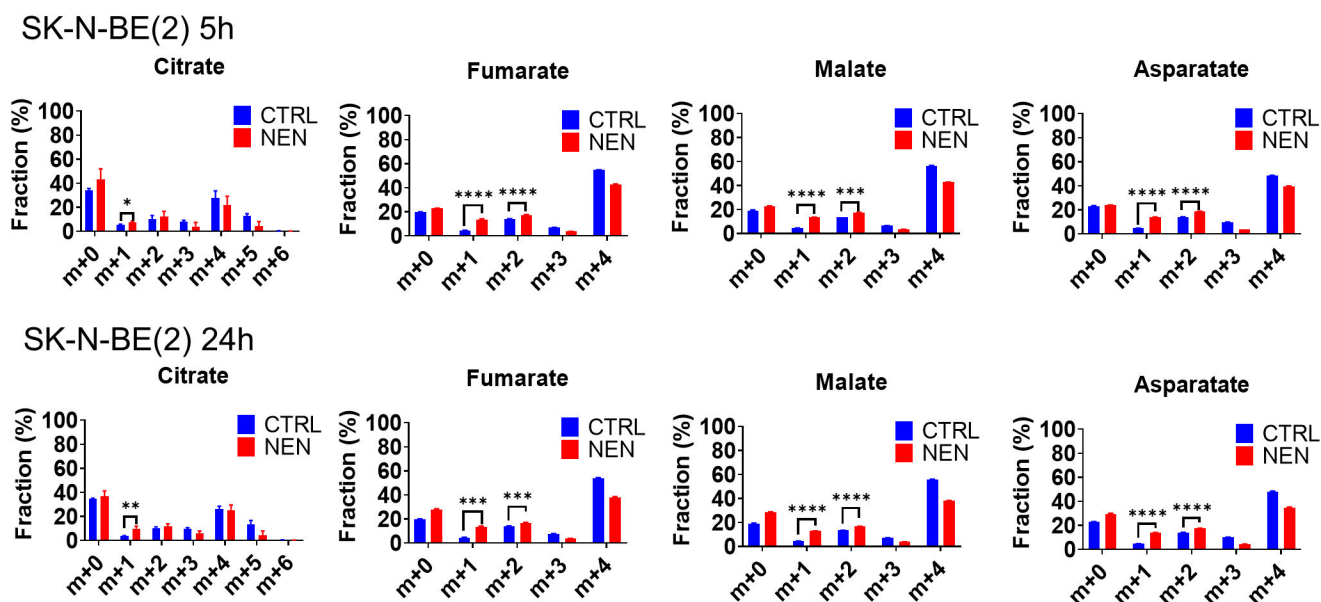

**B**

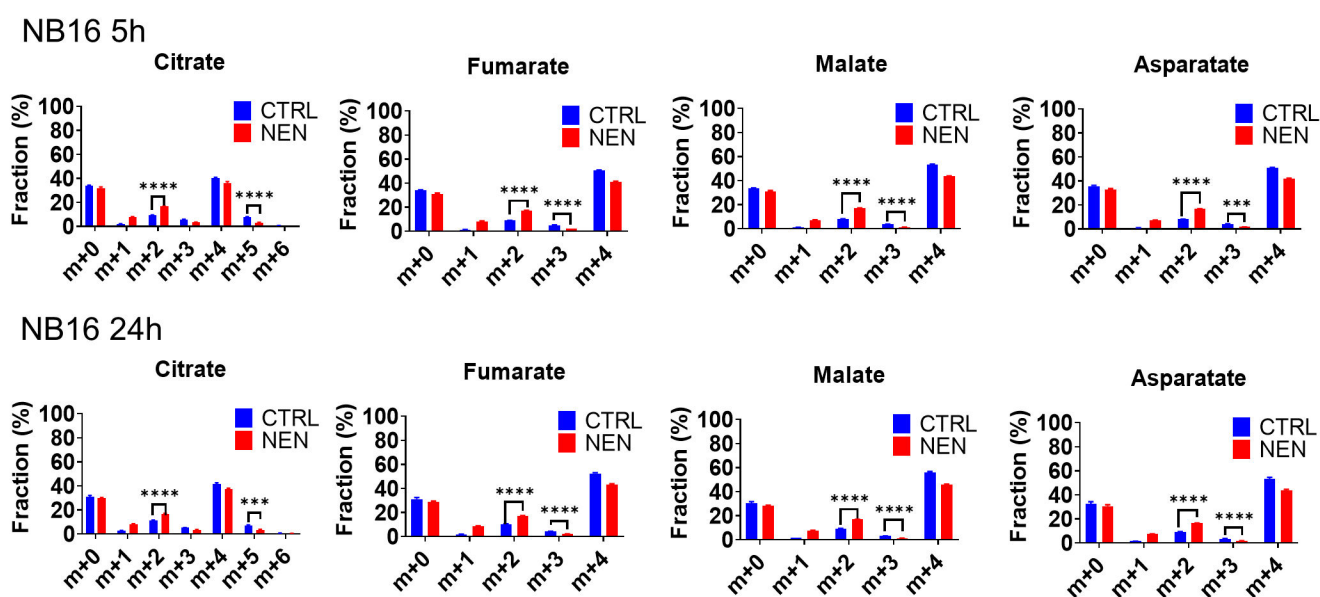

## Supplemental Figure 2

(A, B) Isotopic distribution of metabolites in NB16 and SK-N-BE(2) cells pretreated with DMSO or 1  $\mu$ M NEN for 3 hours or 22 hours, then labeled with U- $^{13}$ C-glutamine for 2 hours. Isotopic labeling fractions of metabolites were measured using LC-MS.
