# Supplementary material
Source: PubMed Central journal article supplement (PMC10592403)
Supplement: NIHMS1914154-supplement-3.pdf [file NIHMS1914154-supplement-3.pdf]

# Supplemental Figure 3

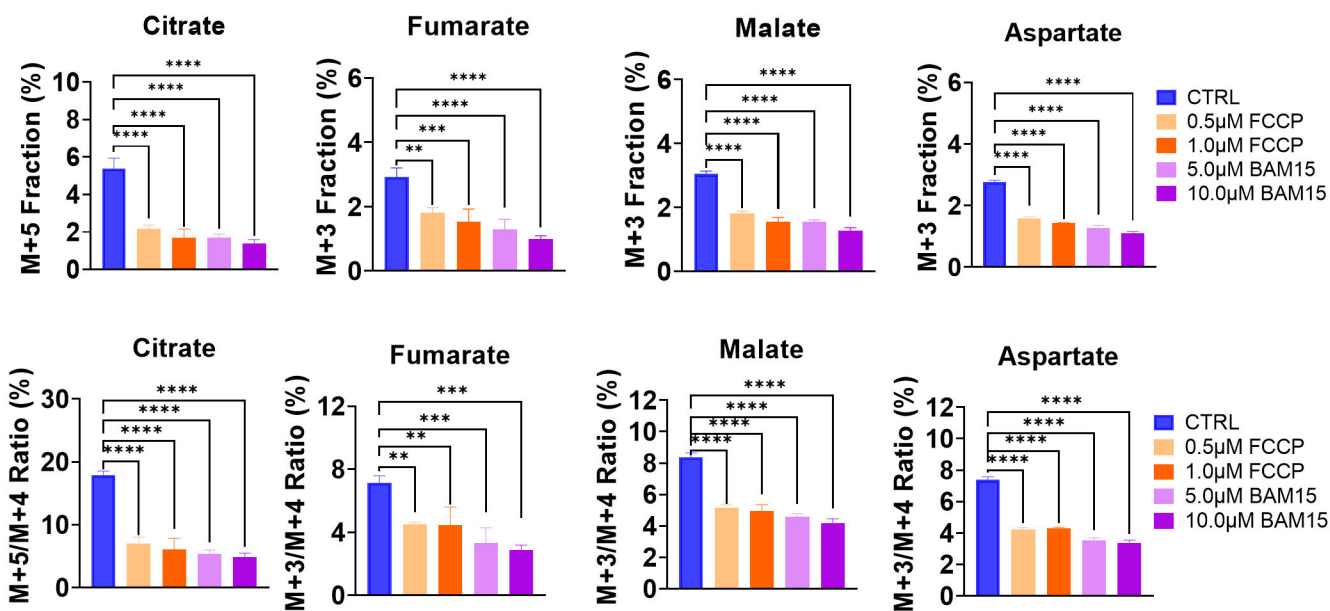

## Supplemental Figure 3

NB16 cells were pretreated with DMSO or the indicated concentrations of FCCP or BAM15 for 3 hours then labeled with U-<sup>13</sup>C-glutamine for 2 hours. Relative isotopic labeling fractions or ratios of citrate, fumarate, malate, and aspartate were measured using LC-MS.
