# Supplementary material
Source: PubMed Central journal article supplement (PMC10592403)
Supplement: NIHMS1914154-supplement-4.pdf [file NIHMS1914154-supplement-4.pdf]

# Supplemental Figure 4

A

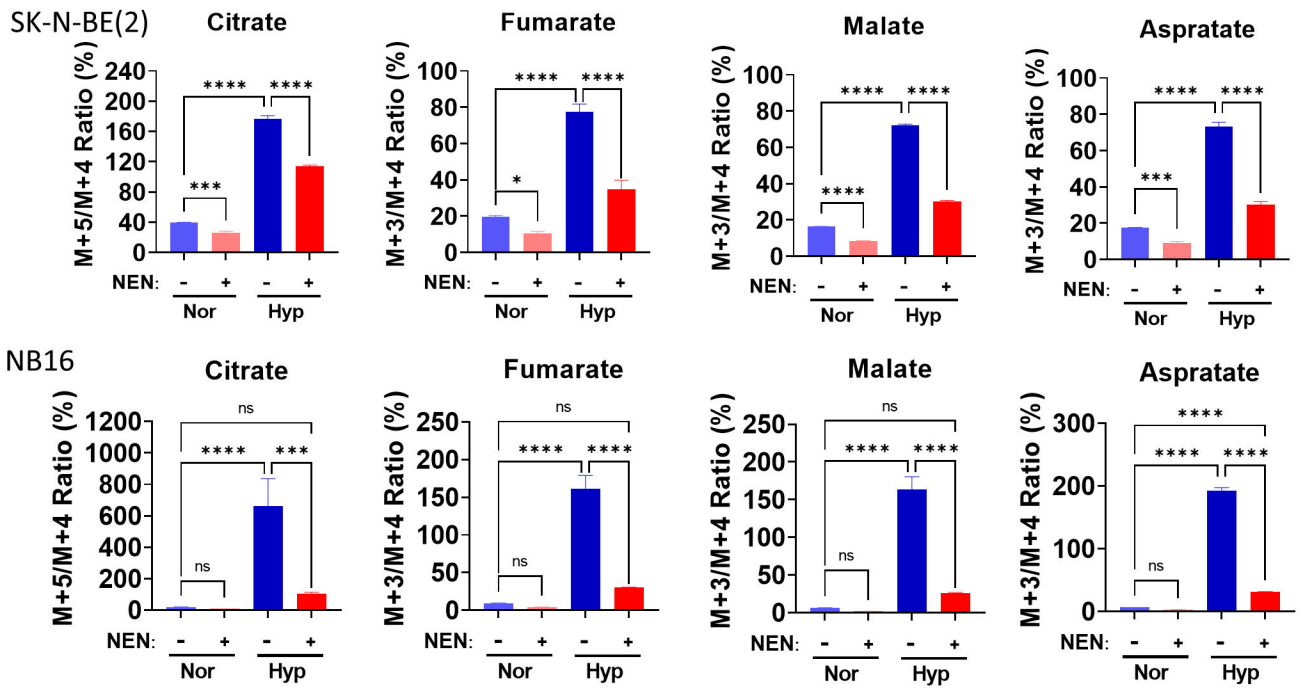

B

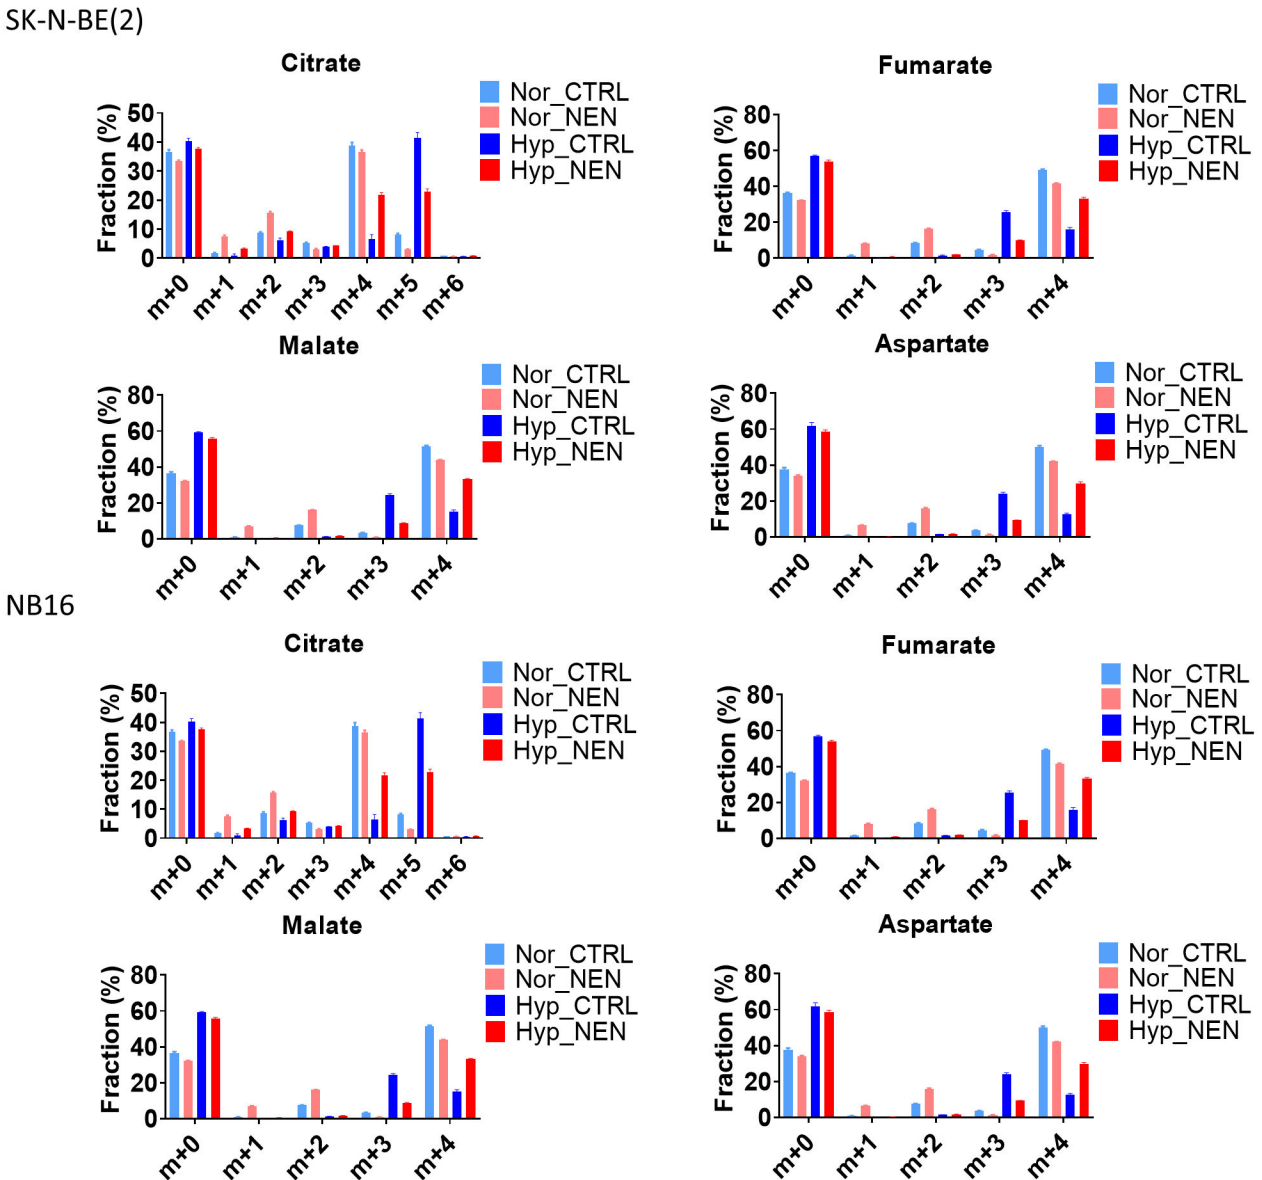

#### Supplemental Figure 4

**(A)** SK-N-BE(2) and NB16 cells were pretreated under normoxia or hypoxia (0.5% O<sub>2</sub>), followed with DMSO or 1 μM NEN treatment for 3 hours under normoxia or hypoxia (0.5% O<sub>2</sub>), then labeled with U-<sup>13</sup>C-glutamine. The relative isotopic labeling fraction of metabolites were measured using LC-MS (n=3). **(B)** The Isotopic distribution of metabolites from **(A)** were presented.
