# Supplementary material
Source: PubMed Central journal article supplement (PMC10592403)
Supplement: NIHMS1914154-supplement-5.pdf [file NIHMS1914154-supplement-5.pdf]

# Supplemental Figure 5

A

①○○○○ [1-<sup>13</sup>C]glutamine

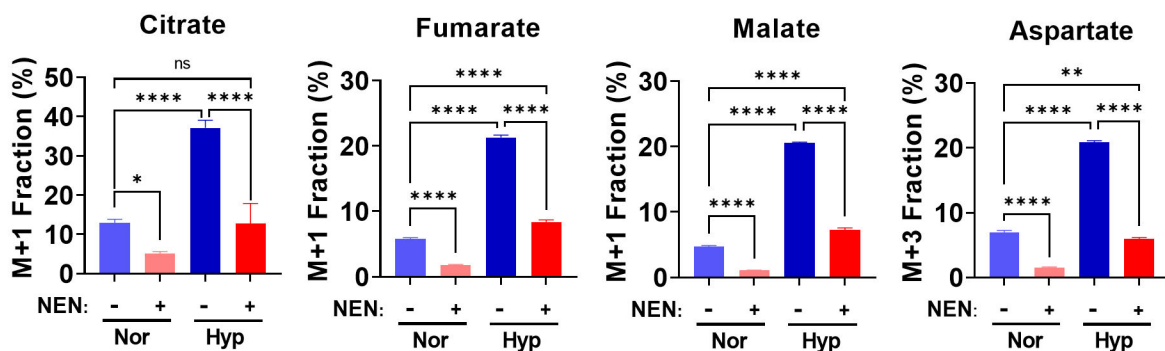

B

●●●●● [U-<sup>13</sup>C]glutamine

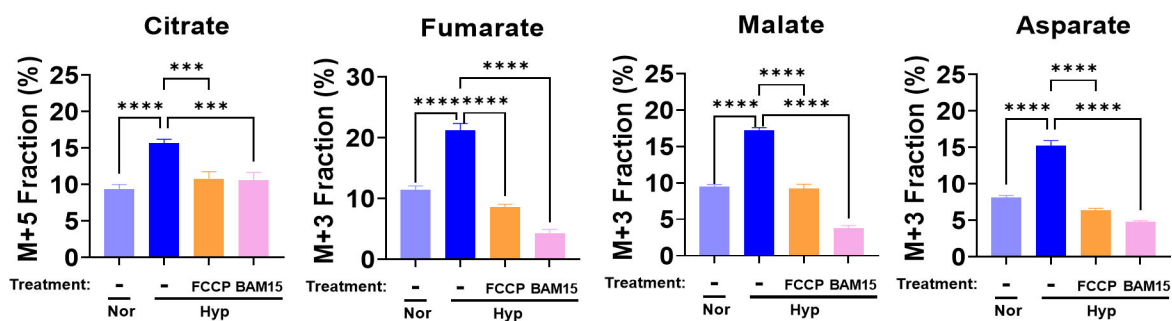

## Supplemental Figure 5

(A) SK-N-BE(2) cells were pretreated with DMSO or 1  $\mu$ M NEN for 3 hours under normoxia or hypoxia (0.5% O<sub>2</sub>), then labeled with or 1-<sup>13</sup>C-glutamine for 2 hours. Relative isotopic labeling fractions of metabolites were measured using LC-MS. (D) SK-N-BE(2) cells were pretreated with DMSO, 2  $\mu$ M FCCP, or 5 $\mu$ M BAM15 for 3 hours under normoxia or hypoxia (0.5% O<sub>2</sub>), then labeled with U-<sup>13</sup>C-glutamine for 2 hours. The relative isotopic labeling fraction of metabolites were measured using LC-MS.
