# Supplementary material
Source: PubMed Central journal article supplement (PMC10592403)
Supplement: NIHMS1914154-supplement-6.pdf [file NIHMS1914154-supplement-6.pdf]

# Supplemental Figure 6

## A

### 786-O

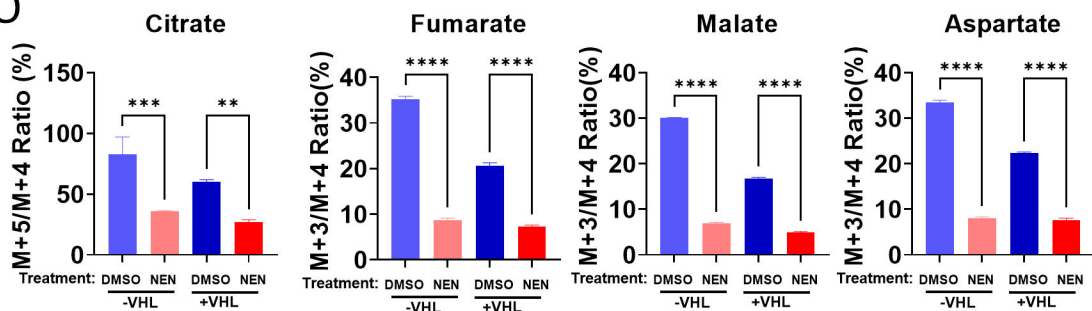

### RCC4

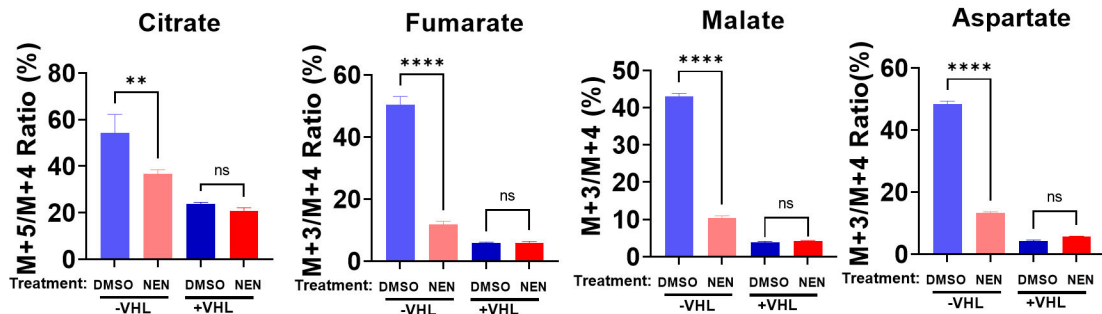

## B

### 786-O

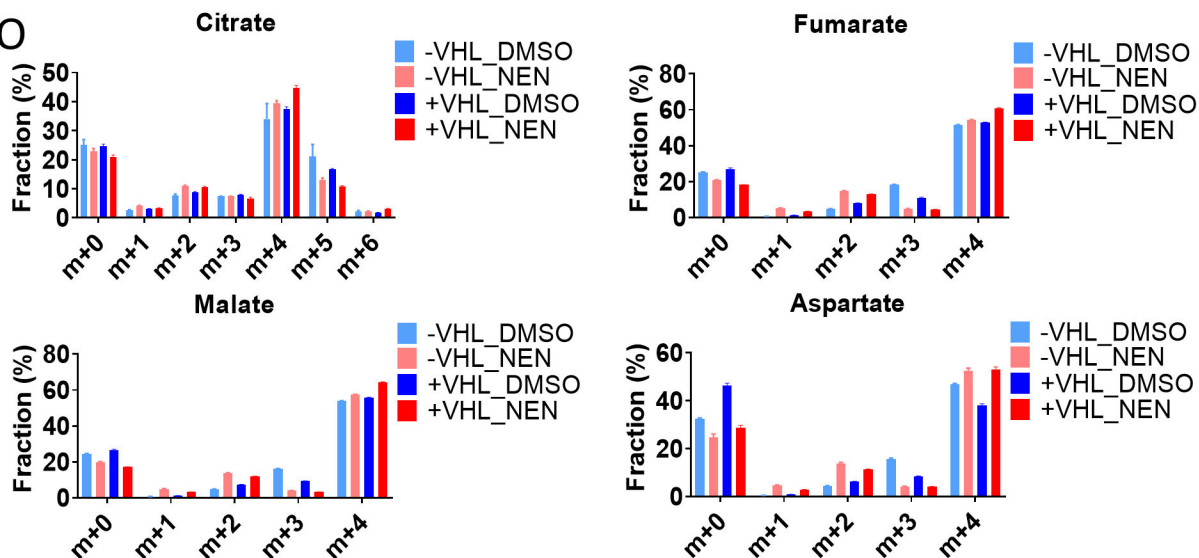

### RCC4

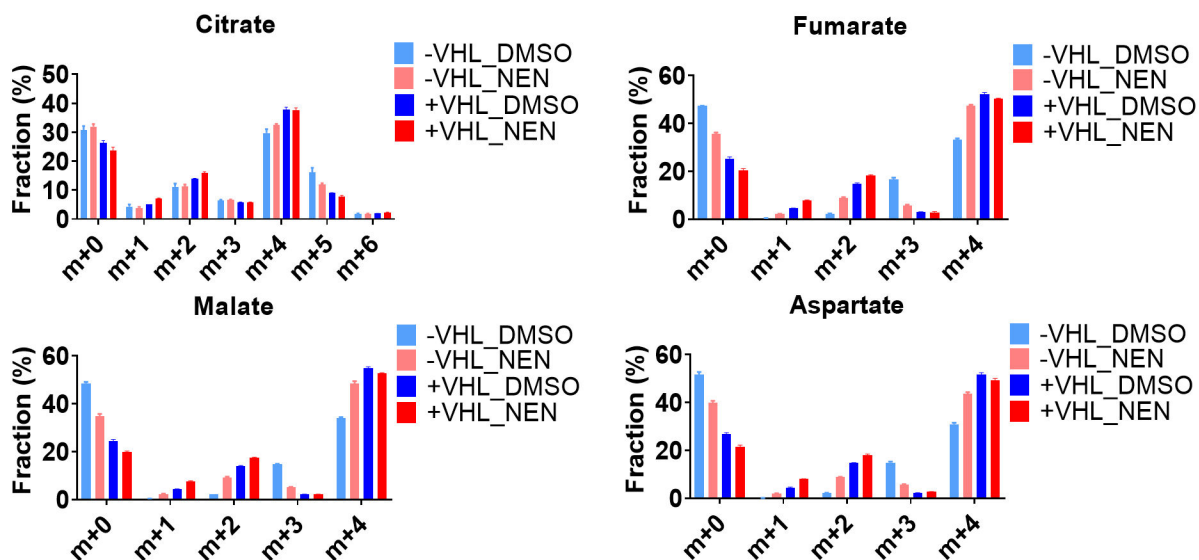

## Supplemental Figure 6

**(A)** The ccRCC cells were pretreated with DMSO or 1  $\mu$ M NEN for 3 hours, then labeled with U- $^{13}$ C-glutamine for 3 hours. **(B)** The Isotopic distribution of metabolites from **(A)** were presented.
