# Supplementary material
Source: PubMed Central journal article supplement (PMC10592403)
Supplement: NIHMS1914154-supplement-7.pdf [file NIHMS1914154-supplement-7.pdf]

# Supplemental Figure 7

A

SK-N-BE(2)

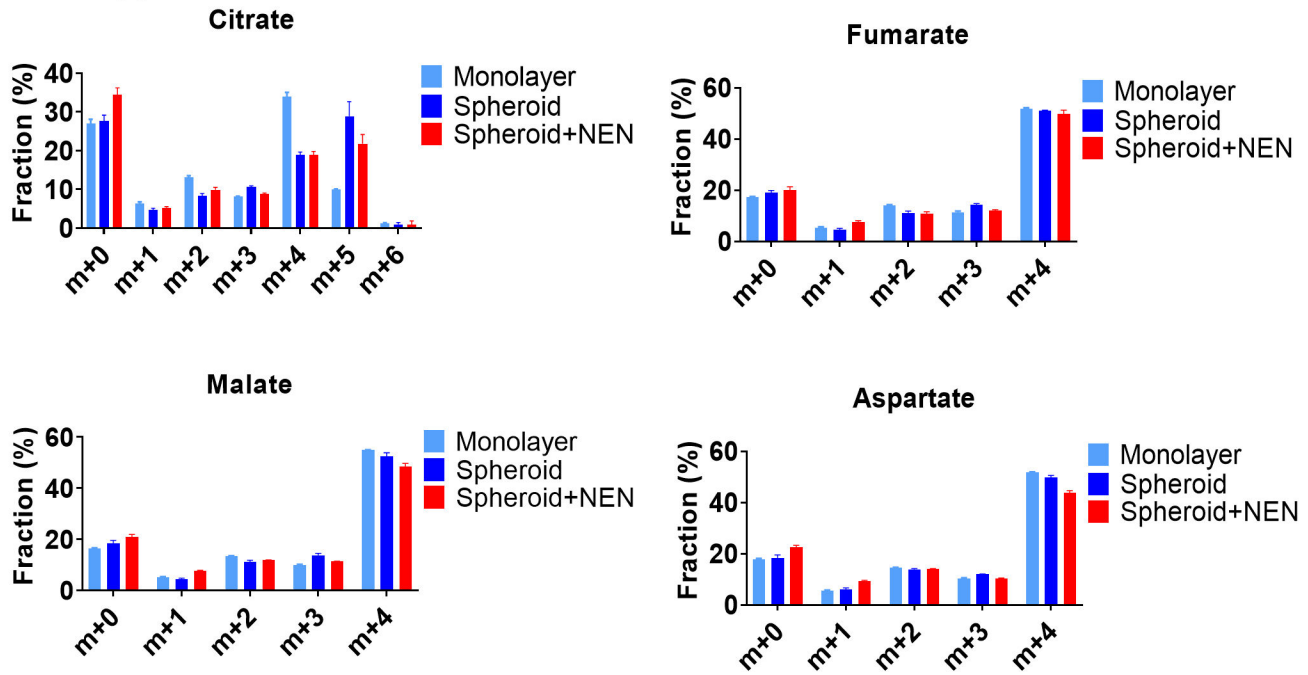

B

NB16

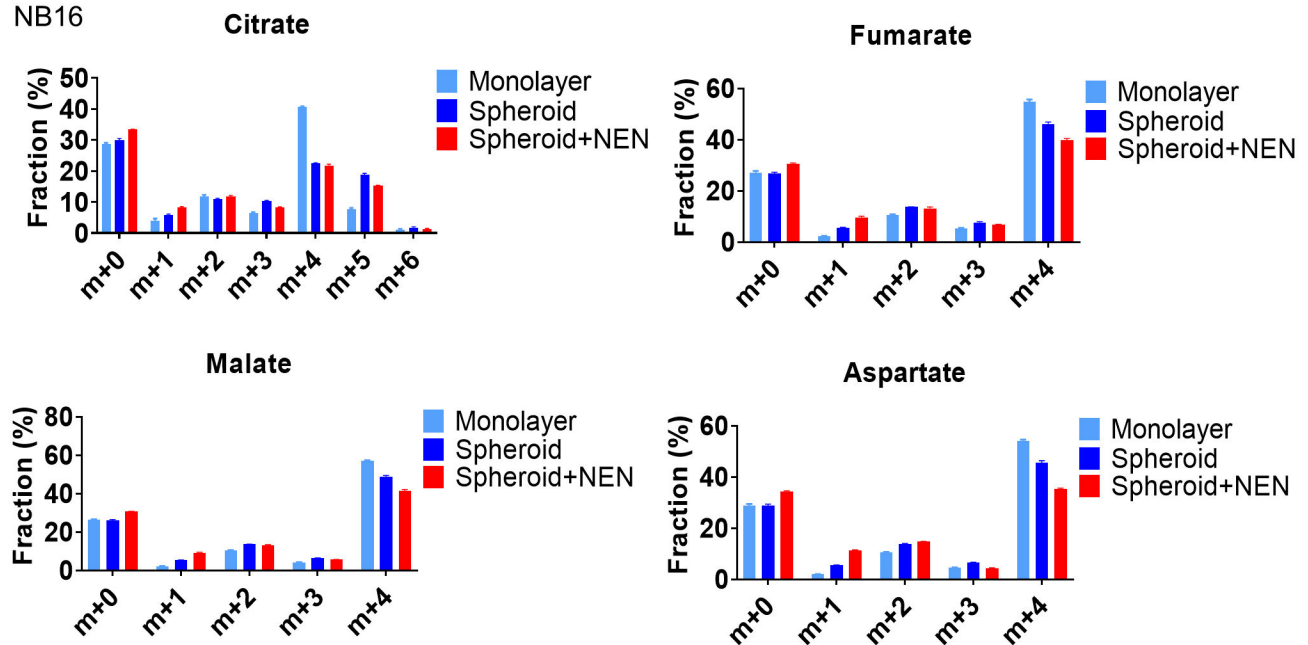

## Supplemental Figure 7

(A, B) SK-N-BE(2) and NB16 in monolayer culture, or spheroid culture condition treated with DMSO or 1  $\mu$ M NEN for 3 hours, were labeled with U-<sup>13</sup>C-glutamine for 3 hours. Relative isotopic labeling fractions or ratios of metabolites were measured using LC-MS. The Isotopic distribution of metabolites presented.
