# Supplementary material
Source: PubMed Central journal article supplement (PMC10592403)
Supplement: NIHMS1914154-supplement-8.pdf [file NIHMS1914154-supplement-8.pdf]

# Supplemental Figure 8

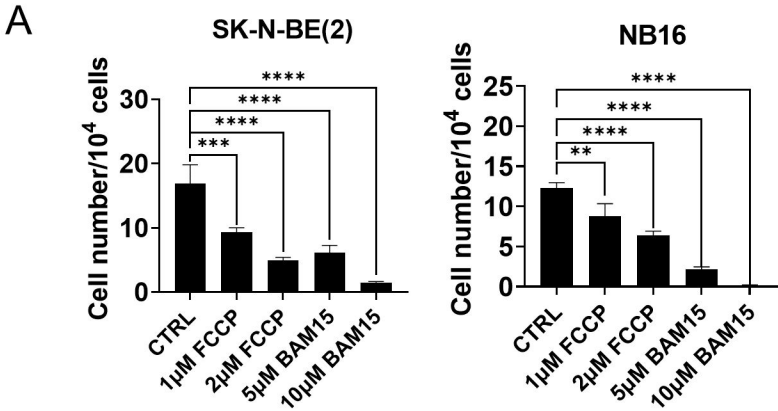

## Supplemental Figure 8

**(A)** Cell counts of SK-N-BE(2) and NB16 treated with DMSO or indicated concentrations of FCCP or BAM15 for 12 days in low attachment dishes.
