# Supplementary material
Source: PubMed Central journal article supplement (PMC10592403)
Supplement: NIHMS1914154-supplement-9.pdf [file NIHMS1914154-supplement-9.pdf]

# Supplemental Figure 9

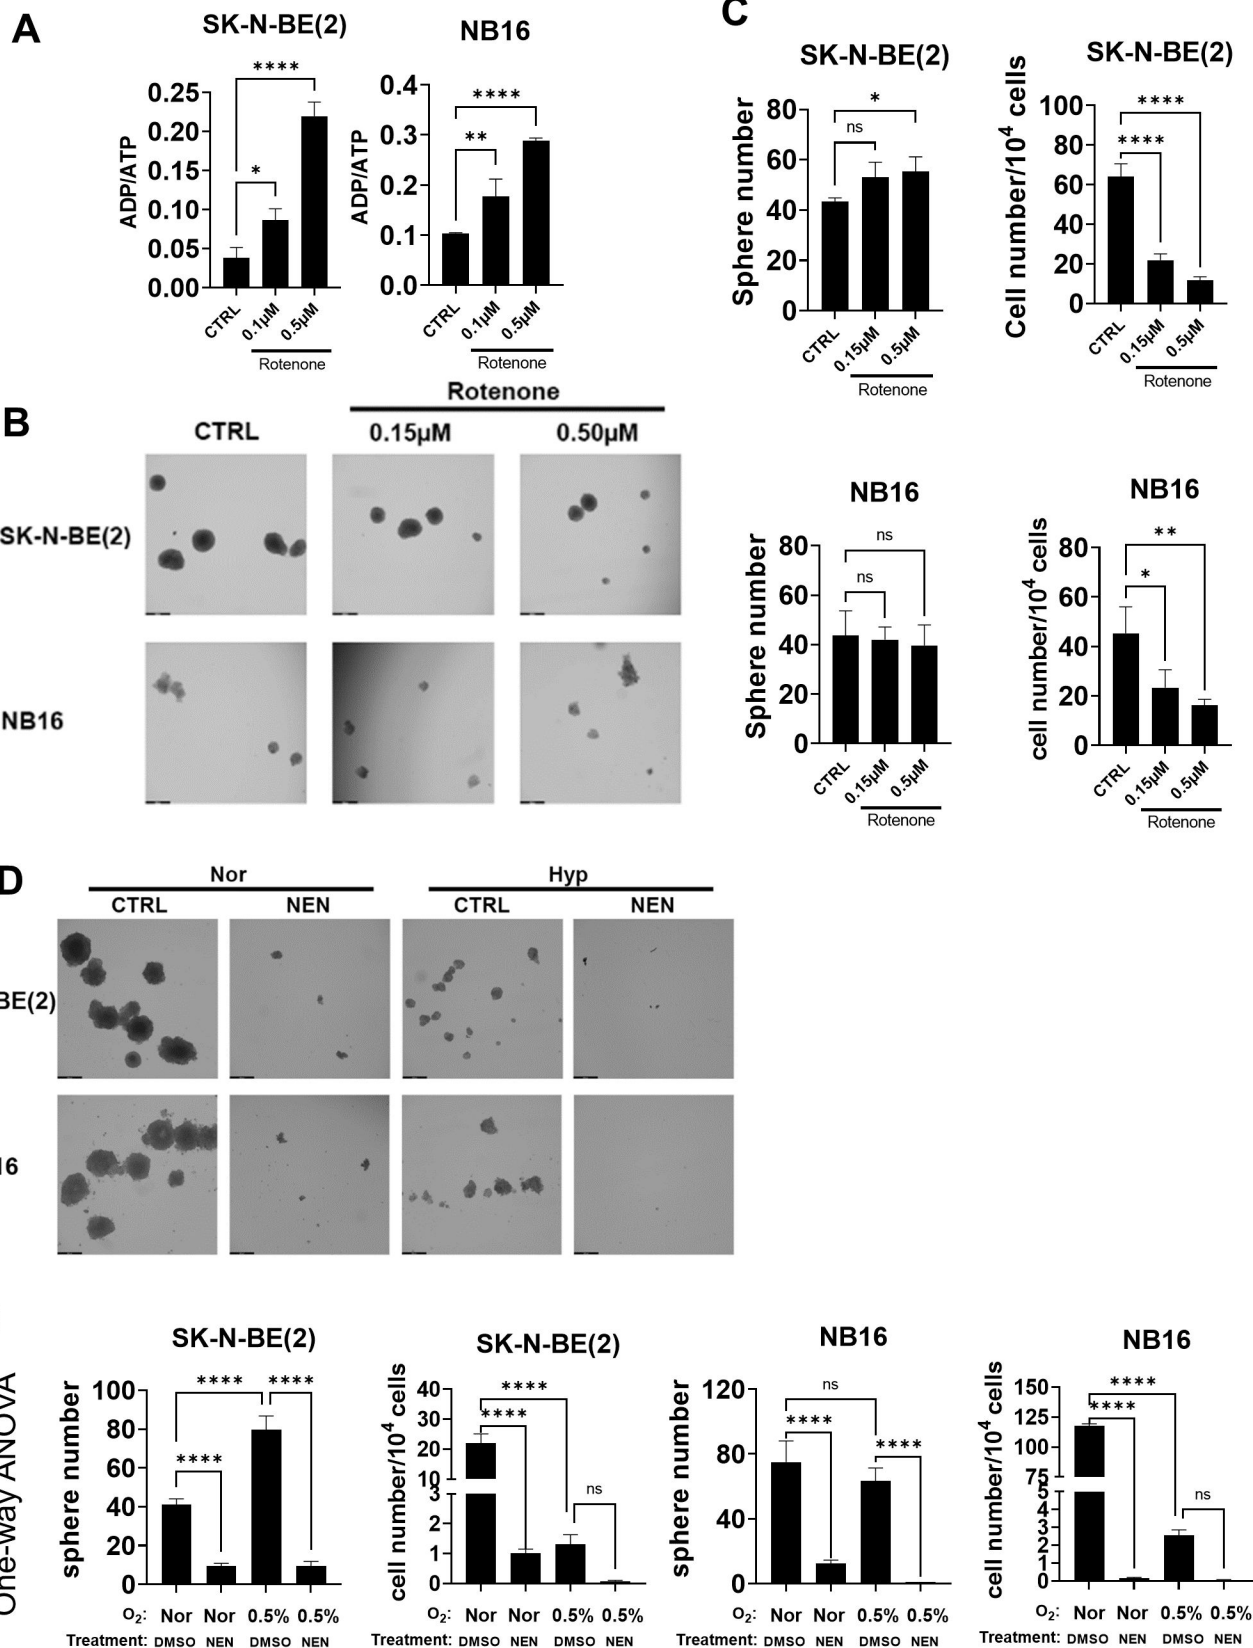

## Supplemental Figure 9

(A) SK-N-BE(2) and NB16 were treated with DMSO or different concentration of Rotenone for 5 hours. Relative isotopic labeling fractions or ratios of metabolites were measured using LC-MS (n=3). (B) Morphology of SK-N-BE(2) and NB16 spheroids treated with DMSO or different concentration of Rotenone for 12 days in low attachment dishes. (Scale bar: 500μm) (C) Quantitation of spheroid and cell number from samples shown in (B). (D) Morphology of SK-N-BE(2) and NB16 spheroid treated with DMSO or 1μM NEN under normoxia or hypoxia (0.5%) for 12 days in low attachment dishes. (Scale bar: 500μm) (E) Quantitation of spheroid and cell number from samples shown in (D).
